# Supplementary material for: Metal (Cu, Au)-modified silicon nanowires for high-selectivity solvent-free hydrocarbon oxidation in air
Source: Royal Society of Chemistry journal article supplement (doi:10.1039/b912341e), 2009-01-01
Supplement: b912341e.pdf [file b912341e.pdf]

## **Metal (Cu, Au)-Modified Silicon Nanowires for High-Selectivity Solvent-Free Hydrocarbon Oxidation in Air (Supporting information)**

### **Experimental details.**

SiNWs were prepared by the thermal-evaporation oxide-assisted growth method. The oxide layer of the as-grown SiNWs was removed by 5% HF etching for 30 min. Gold nanoparticles (AuNPs) deposition was performed by direct immersion of H-SiNWs into AuCl<sub>3</sub> solution (1×10<sup>-3</sup> M). The product was then rinsed lightly by deionized water. Copper nanoparticles (CuNPs) deposition was performed similarly by using CuSO<sub>4</sub> solution (1×10<sup>-3</sup> M) in place of AuCl<sub>3</sub> solution. TEM and EDX characterizations of the samples were performed using a FEI/Philips Techal 12 BioTWIN TEM and EDX attached to the TEM microscope. HR-TEM characterization was carried out with a CM200 FEG TEM. TEM images reveal that AuNPs and CuNPs are randomly deposited on the surface of SiNWs. AuNPs on SiNWs have sizes of 10-90 nm, while CuNPs on SiNWs have sizes of 5-30 nm. The EDX analysis results reveal that Au in AuNPs was 66 wt%, while that of Cu in CuNPs was 50 wt%, which indicated that the metal (Au, Cu) was effectively anchored on the SiNWs surface with high metal content. The XRD patterns were obtained on a Rigaku D/max 2500V PC diffractometer using CuK $\alpha$  radiation. Nitrogen-sorption isotherms of catalyst (SiNWs, AuNPs/SiNWs, and CuNPs/SiNWs) were determined at -196 °C using nitrogen in a conventional volumetric technique by a Micromeritics ASAP2020 sorptometer.

In a typical catalytic experiment, the oxidation of cis-cyclooctene (Sigma-Aldrich, 95%) under mild condition was performed in a 50 ml round bottom flask, which was connected to a water condenser and equipped with a magnetic stirrer. Briefly, 25 mg of AuNPs/SiNWs or CuNPs/SiNWs was dispersed in 10 ml of cis-cyclooctene. Then 0.12 g of tert-butyl hydrogen peroxide (TBHP) (Sigma-Aldrich, 37%, aqueous) was added dropwise to the system free of solvent. The reaction was carried out in air at ambient pressure at 60-80 oC in an oil bath, and the mixture was stirred for 24 h. The sample was extracted from the reaction system every hour in the first 12 hr, followed by every 6 h in the next 12 h. Oxidation of cyclohexene (Sigma-Aldrich, 95%) under mild condition was performed in the 50 ml round bottom flask which connected to a water condenser and equipped with a magnetic stirrer. Briefly, 25 mg of AuNPs/SiNWs or CuNPs/SiNWs were dispersed in 10 ml of cyclohexene. Then 0.12 g of tert-butyl hydrogenperoxide (TBHP) (Sigma-Aldrich, 37%, aqueous) was drop wise added to the system. No solvent was added to the mixture. The

reaction was carried out in the same reaction condition as the selective oxidation of cis-cyclooctene.

Analysis of products was carried out by using gas chromatography-mass spectrometry measurements, performed using an Agilent 6890 GC system coupled to an Agilent 5973 quadrupole mass-selective detector equipped with a HP 5MS column (30 m long, 0.25 mm i.d., 0.25  $\mu$  m film thickness).

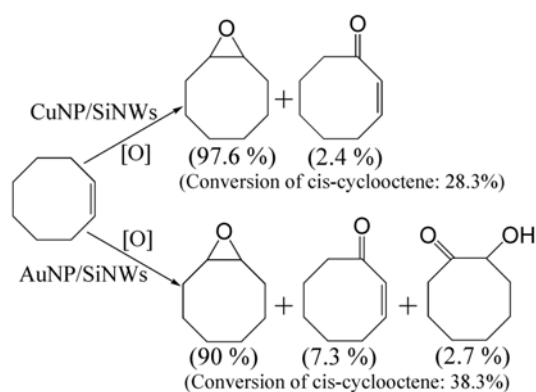

**Scheme S1.** Reaction schemes of cis-cyclooctene epoxidation catalyzed by Cu- and Au-modified SiNWs at 60-80 °C for 24 h.

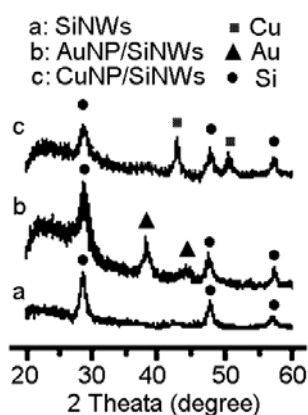

**Figure S1** The XRD patterns of SiNWs (a), AuNP/SiNWs(b), and CuNP/SiNWs(c).

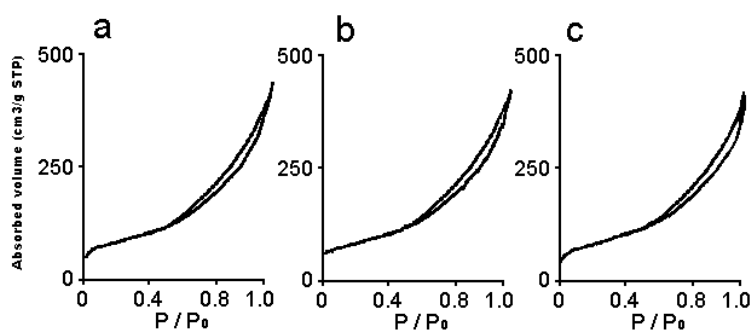

**Figure S2** The nitrogen adsorption/desorption isotherms of SiNWs (a), AuNPs/SiNWs(b), and CuNPs/SiNWs (c).

**Table S1.** Cis-Cyclooctene (10 ml) oxidation with molecular oxygen and free radical initiator TBHP (0.12 g) in the absence of solvent (25 mg catalyst) after 24 h.

| Catalyst | Selectivity (%)                                                                   |                                                                                   |                                                                                   |                                                                                   |                                                                                   | Conversion (%) | $\Sigma_{\text{sel}}\text{C}_8^{\S}$ |
|----------|-----------------------------------------------------------------------------------|-----------------------------------------------------------------------------------|-----------------------------------------------------------------------------------|-----------------------------------------------------------------------------------|-----------------------------------------------------------------------------------|----------------|--------------------------------------|
|          |  |  |  |  |  |                |                                      |
| Au/SiNWs | 90                                                                                | 7.3                                                                               | 2.7                                                                               | --                                                                                | --                                                                                | 38.3           | 100                                  |
| Cu/SiNWs | 97.6                                                                              | 2.4                                                                               | --                                                                                | --                                                                                | --                                                                                | 28.3           | 100                                  |
| H-SiNWs  | 100                                                                               | --                                                                                | --                                                                                | --                                                                                | --                                                                                | 8.2            | 100                                  |
| Au/C*    | 81.2                                                                              | 4.1                                                                               | --                                                                                | 9.3                                                                               | 0.5                                                                               | 7.9            | 95.1                                 |

<sup>§</sup>Total selectivity of C<sub>8</sub> partial oxidation products. \*Data taken from Ref 2a, mass of Au/C = 0.12 g, mass of TBHP = 0.12 g.

**Table S2.** Oxidation of cyclooctene with Au/SiNWs and Au/C as catalysts (different metal loading) under the same condition (reaction time 24 h; catalyst mass 50mg; cyclooctene, 20ml; free radical initiator TBHP, 0.12 g).

|                                   | Au/SiNWs | Au/C  | Au/SiNWs | Au/C  | Au/SiNWs | Au/C   | Au/SiNWs | Au/C   |
|-----------------------------------|----------|-------|----------|-------|----------|--------|----------|--------|
|                                   | Au,1%    | Au,1% | Au,3%    | Au,3% | Au,10%   | Au,10% | Au,20%   | Au,20% |
| Conversion<br>(cyclooctene)       | 13%      | 3%    | 21%      | 5%    | 29%      | 9%     | 37%      | 14%    |
| Selectivity<br>(epoxycyclooctane) | 96%      | 81%   | 95%      | 81%   | 95%      | 78%    | 93%      | 79%    |

**Table S3.** Cyclohexene (10 ml) oxidation with molecular oxygen and free radical initiator TBHP (0.12 g) in the absence of solvent (25 mg catalyst) after 24 h.

| Catalyst | Selectivity (%)                                                                     |                                                                                     |                                                                                     | Conversion (%) | $\Sigma_{\text{sel}}\text{C}_6^{\S}$ |
|----------|-------------------------------------------------------------------------------------|-------------------------------------------------------------------------------------|-------------------------------------------------------------------------------------|----------------|--------------------------------------|
|          |  |  |  |                |                                      |
| Au/SiNWs | 0.2                                                                                 | 24.9                                                                                | 74.9                                                                                | 92.8           | 100                                  |
| Cu/SiNWs | 0.1                                                                                 | 46.3                                                                                | 53.7                                                                                | 98.4           | 100                                  |
| Au/C*    | 50.2                                                                                | tr                                                                                  | 26.3                                                                                | 29.7           | 76.5                                 |

<sup>§</sup>Total selectivity of C<sub>6</sub> partial oxidation products.\*Data taken from Ref 2a, mass of Au/C = 0.22 g, C<sub>6</sub>H<sub>10</sub> (0.012 mol), 1,2,3,5-tetramethyl-benzene (20ml), TBHP (5 mol% based on C<sub>6</sub>H<sub>10</sub>), 80 °C, 24 h.
